# Supplementary material
Source: PubMed Central journal article supplement (PMC6668522)
Supplement: Document1.pdf [file Document1.pdf]

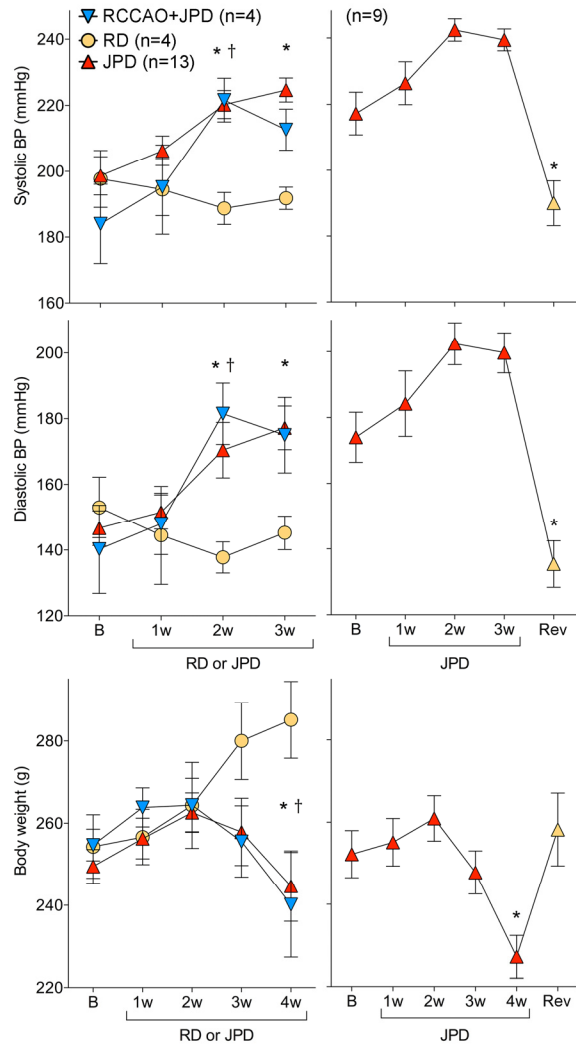

Supplementary Figure 1

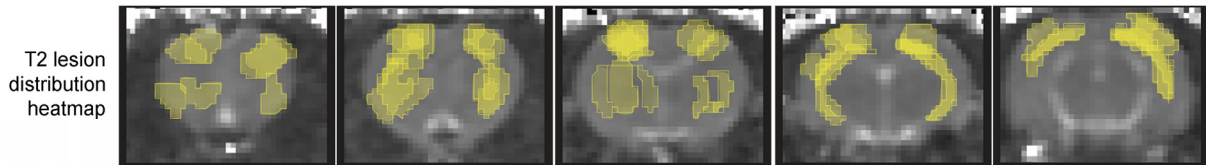

Supplementary Figure 2

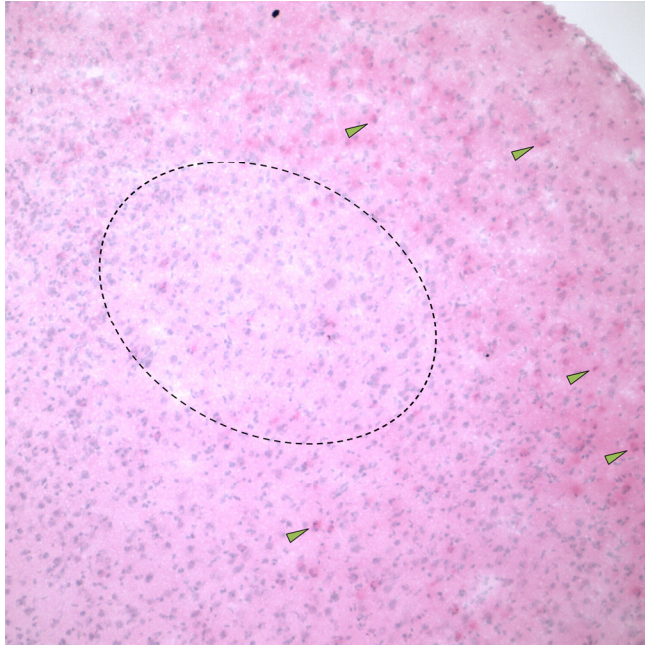

Supplementary Figure 3

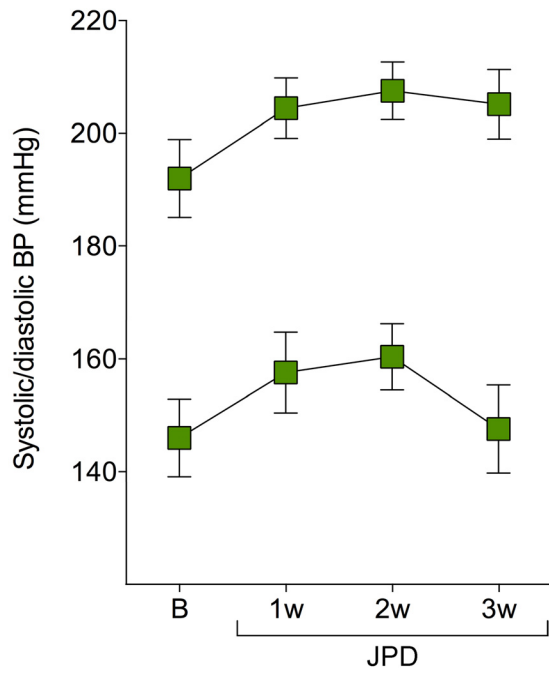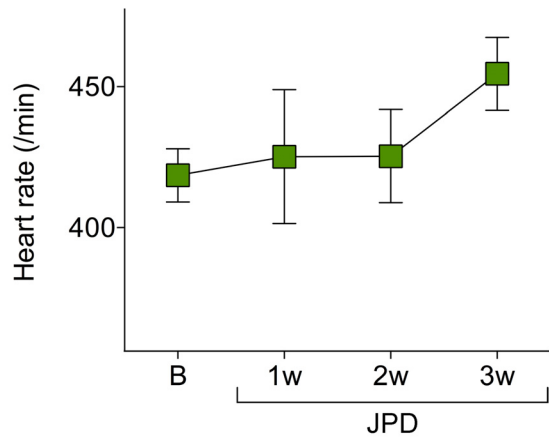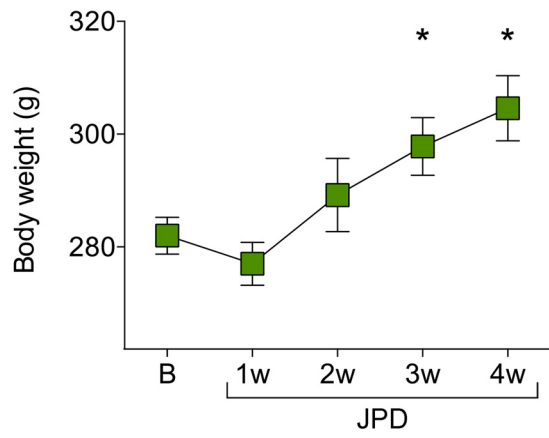

Supplementary Figure 4

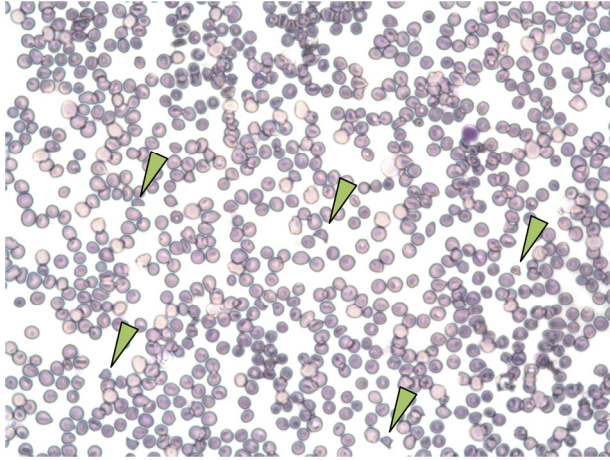

Supplementary Figure 5

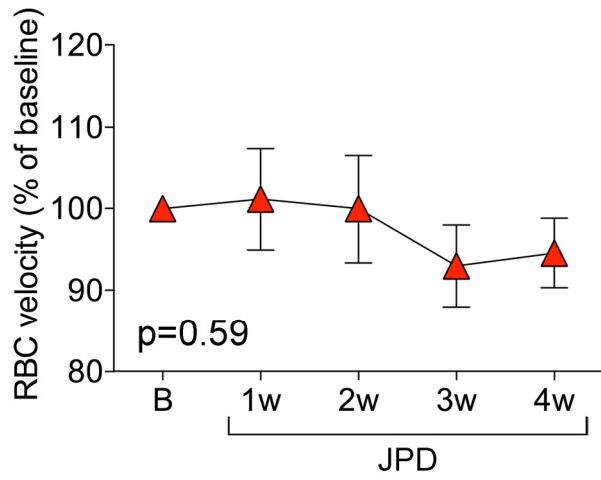

Supplementary Figure 6
