# Supplementary material
Source: PubMed Central journal article supplement (PMC6668522)
Supplement: Supplementary_Table1.pdf [file Supplementary_Table1.pdf]

**Supplemental Table 1. Plasma chemistry in SHRSP**

|                                    | Na <sup>+</sup> (mM) | K <sup>+</sup> (mM) | Creatinine (mg/dl) |
|------------------------------------|----------------------|---------------------|--------------------|
| Regular diet<br>(n=6)              | 139 ± 1              | 3.9 ± 0.1           | 0.22 ± 0.02        |
| High-salt diet<br>(n=12)           | 142 ± 1              | 4.3 ± 0.2           | 0.33 ± 0.04        |
| High-salt diet + RCCAO<br>(n=7)    | 145 ± 2*             | 3.5 ± 0.2‡          | 0.37 ± 0.03*       |
| High-salt diet + Reversal<br>(n=9) | 140 ± 1              | 4.6 ± 0.2           | 0.23 ± 0.02        |

Samples were collected at the time of sacrifice. \*p<0.05 vs. regular diet and high-salt diet + reversal; ‡ vs. high-salt diet and high-salt diet + reversal. One-way ANOVA followed by Holm-Sidak's multiple comparisons test.
